# Supplementary material for: Photoactivity and electronic properties of graphene-like materials and TiO2 composites using first-principles calculations
Source: Royal Society of Chemistry journal article supplement (doi:10.1039/c6ra12980c), 2016-01-01
Supplement: c6ra12980c1.pdf [file c6ra12980c1.pdf]

## Table

**Table 1** Bond lengths of TiO<sub>2</sub> cluster and TiO<sub>2</sub>/GLM.

| Bond | TiO <sub>2</sub> cluster(Å) | TiO <sub>2</sub> /graphene(Å) | TiO <sub>2</sub> /MoS <sub>2</sub> (Å) | TiO <sub>2</sub> /C <sub>3</sub> N <sub>4</sub> (Å) | TiO <sub>2</sub> /BP(Å) |
|------|-----------------------------|-------------------------------|----------------------------------------|-----------------------------------------------------|-------------------------|
| 1    | 1.745                       | 1.754                         | 1.751                                  | 1.788                                               | 1.757                   |
| 2    | 1.744                       | 1.754                         | 1.753                                  | 1.759                                               | 1.792                   |
| 3    | 2.001                       | 2.003                         | 2.003                                  | 1.959                                               | 2.011                   |
| 4    | 2.008                       | 1.993                         | 1.992                                  | 1.999                                               | 1.926                   |
| 5    | 2.076                       | 2.037                         | 2.049                                  | 2.021                                               | 2.033                   |
| 6    | 2.084                       | 2.040                         | 2.042                                  | 2.035                                               | 1.979                   |
| 7    | 1.868                       | 1.870                         | 1.879                                  | 1.876                                               | 1.890                   |
| 8    | 1.858                       | 1.870                         | 1.856                                  | 1.868                                               | 1.854                   |
| 9    | 1.640                       | 1.647                         | 1.642                                  | 1.660                                               | 1.641                   |
| 10   | 1.643                       | 1.647                         | 1.663                                  | 1.650                                               | 1.702                   |

**Table 2** Bond angles of TiO<sub>2</sub> cluster and TiO<sub>2</sub>/GLM.

| Bond angle | TiO <sub>2</sub> cluster | TiO <sub>2</sub> /graphene | TiO <sub>2</sub> /MoS <sub>2</sub> | TiO <sub>2</sub> /C <sub>3</sub> N <sub>4</sub> | TiO <sub>2</sub> /BP |
|------------|--------------------------|----------------------------|------------------------------------|-------------------------------------------------|----------------------|
| ∠1         | 108.49°                  | 110.58°                    | 110.61°                            | 109.91°                                         | 106.80°              |
| ∠2         | 96.85°                   | 96.55°                     | 96.79°                             | 97.45°                                          | 97.40°               |
| ∠3         | 96.90°                   | 96.73°                     | 97.02°                             | 96.79°                                          | 97.27°               |
| ∠4         | 86.37°                   | 88.39°                     | 88.35°                             | 87.86°                                          | 89.03°               |
| ∠5         | 123.96°                  | 123.45°                    | 123.46°                            | 120.08°                                         | 122.70°              |
| ∠6         | 124.86°                  | 122.46°                    | 123.46°                            | 121.68°                                         | 118.68°              |
| ∠7         | 77.636°                  | 78.291°                    | 78.033°                            | 80.359°                                         | 78.671°              |
| ∠8         | 77.425°                  | 78.413°                    | 78.433°                            | 79.830°                                         | 82.301°              |
